# Supplementary material for: Diet Influences the Oral Microbiota of Infants during the First Six Months of Life
Source: MDPI journal article supplement (doi:10.3390/nu12113400), 2020-11-05
Supplement: s1 [file s1]

# Supplementary Materials:

**Table S1.** Dietary information of infants at each time point

| ID# | Birth                  | 2 mo                   | 4 mo                   | 6 mo                           |
|-----|------------------------|------------------------|------------------------|--------------------------------|
| 101 | human milk             | human milk             | human milk             | human milk, formula, and solid |
| 103 | human milk             | human milk             | human milk             | human milk                     |
| 104 | human milk and formula | human milk and formula | human milk and formula | human milk, formula, and solid |
| 106 | human milk and formula | formula                | formula and solid      | formula and solid              |
| 107 | human milk             | human milk             | human milk and formula | human milk and solid           |
| 108 | human milk             | human milk             | human milk             | human milk and solid           |
| 109 | human milk             | human milk and formula | human milk and formula | human milk, formula, and solid |
| 110 | human milk             | human milk             | human milk             | human milk and solid           |
| 111 | human milk             | human milk             | human milk             | human milk                     |
| 112 | human milk and formula | human milk and formula | formula                | formula and solid              |
| 114 | human milk             | human milk and formula | human milk and formula | human milk, formula, and solid |
| 115 | human milk             | human milk             | human milk             | human milk and solid           |

**Table S2.** Additional information of infants/mothers, and delivery complications

| ID# | Term <sup>1</sup> | Delivery complications <sup>2</sup>  | APGAR Score <sup>3</sup>     | Infant weight at birth | Infant height at birth | Prescribed antibiotic/antifungal for mom | Prescribed antibiotic/antifungal for infant |
|-----|-------------------|--------------------------------------|------------------------------|------------------------|------------------------|------------------------------------------|---------------------------------------------|
| 101 | Full term         | GBS positive                         | 1 minute - 9<br>5 minute - 9 | 3572 g                 | 50.8 cm                | Ampicillin - DOB                         |                                             |
| 103 | Full term         | GBS positive<br>Nuchal cord          | 1 minute - 8<br>5 minute - 9 | 3118 g                 | 49.5 cm                | Vancomycin -BOB                          |                                             |
| 104 | Full term         | Nuchal cord<br>Cyanotic              | 1 minute - 7<br>5 minute - 9 | 4819 g                 | 58.4 cm                |                                          |                                             |
| 106 | Early term        | Nuchal cord<br>Mild thrombocytopenia | 1 minute - 4<br>5 minute - 7 | 3459 g                 | 50.2 cm                |                                          |                                             |
| 107 | Early term        | None                                 | 1 minute - 8<br>5 minute - 9 | 4451 g                 | 52.1 cm                |                                          | Amoxicillin - 3 days                        |
| 108 | Full term         | Nuchal cord                          | 1 minute - 8<br>5 minute - 9 | 3374 g                 | 50.8 cm                |                                          |                                             |
| 109 | Full term         | None                                 | 1 minute - 9<br>5 minute - 9 | 4054 g                 | 54.6 cm                |                                          |                                             |
| 110 | Late term         | None                                 | 1 minute - 8<br>5 minute - 9 | 4082 g                 | 52.1 cm                |                                          |                                             |
| 111 | Late term         | None                                 | 1 minute - 8<br>5 minute - 9 | 3884 g                 | 54.6 cm                |                                          |                                             |
| 112 | Full term         | GBS positive<br>Nuchal cord          | 1 minute - 6<br>5 minute - 9 | 3799 g                 | 52.1 cm                | Clindamycin - DOB                        |                                             |
| 114 | Full term         | GBS positive                         | 1 minute - 8<br>5 minute - 9 | 3600 g                 | 54 cm                  | Ampicillin - DOB                         | Nystatin - 3mo                              |
| 115 | Early term        | Hemorrhage                           | 1 minute - 8<br>5 minute - 9 | 3544 g                 | 52.1 cm                |                                          |                                             |

<sup>1</sup>Early term: Your infant is born between 37 wk, 0 d and 38 wk, 6 d; Full term: Your infant is born between 39 wk, 0 d and 40 wk, 6 d; Late term: Your infant is born between 41 wk, 0 d and 41 wk, 6 d.

<sup>2</sup>GBS = Group B streptococcal.

<sup>3</sup>Apgar score [1] includes color, heart rate, reflexes, muscle tone, and respiration. Scores of 7 to 10 are considered reassuring.

**Table S3.** Influence of feeding method on bacterial genera at birth (24 – 48 h after delivery)

| Phyla          | Family               | Genus                    | Diet <sup>1</sup>  |                     | Statistics |          |
|----------------|----------------------|--------------------------|--------------------|---------------------|------------|----------|
|                |                      |                          | Human milk         | Mixed               | SEM        | P-values |
| Actinobacteria | Actinomycetaceae     | <i>Actinomyces</i>       | 0.002              | 0.002               | 0.0004     | 0.8492   |
|                | Propionibacteriaceae | <i>Propionibacterium</i> | 2.669              | 0.227               | 1.5023     | 0.3820   |
| Bacteroidetes  | Porphyromonadaceae   | <i>Porphyromonas</i>     | 0.005              | 0.005               | 0.0012     | 0.9976   |
|                | Prevotellaceae       | <i>Prevotella</i>        | 0.012              | 0.008               | 0.0015     | 0.1422   |
|                | Paraprevotellaceae   | <i>Prevotella</i>        | 0.009              | 0.009               | 0.0012     | 0.8774   |
|                | Weeksellaceae        | Unclassified             | 0.003              | 0.124               | 0.0367     | 0.0696   |
|                |                      | <i>Cloacibacterium</i>   | 3.671              | 0.786               | 2.2667     | 0.5678   |
| Firmicutes     | Staphylococcaceae    | <i>Staphylococcus</i>    | 1.633              | 2.280               | 0.9048     | 0.7752   |
|                | Gemellaceae          | Unclassified             | 9.424              | 9.144               | 6.4588     | 0.5938   |
|                |                      | <i>Gemella</i>           | 0.019              | 0.454               | 0.1381     | 0.2501   |
|                | Carnobacteriaceae    | <i>Granulicatella</i>    | 0.008              | 0.029               | 0.0070     | 0.2453   |
|                | Lactobacillaceae     | <i>Lactobacillus</i>     | 0.002              | 0.002               | 0.0005     | 0.5170   |
|                | Streptococcaceae     | Unclassified             | 0.015              | 0.003               | 0.0100     | 0.8191   |
|                |                      | <i>Streptococcus</i>     | 47.165             | 47.230              | 15.2445    | 0.9980   |
|                | Lachnospiraceae      | Unclassified             | 0.458              | 0.003               | 0.4813     | 0.6892   |
|                | Veillonellaceae      | <i>Veillonella</i>       | 0.027              | 0.053               | 0.0080     | 0.2301   |
|                | Fusobacteriaceae     | <i>Fusobacterium</i>     | 0.001              | 0.001               | 0.0004     | 0.8034   |
|                | Leptotrichiaceae     | <i>Leptotrichia</i>      | 0.003              | 0.004               | 0.0005     | 0.2142   |
| Proteobacteria | Comamonadaceae       | Unclassified             | 10.335             | 2.986               | 6.6671     | 0.7782   |
|                | Neisseriaceae        | <i>Neisseria</i>         | 4.339              | 0.052               | 2.1681     | 0.2571   |
|                | Rhodocyclaceae       | <i>Dechloromonas</i>     | 1.790              | 0.892               | 1.1606     | 0.9396   |
|                | Pasteurellaceae      | <i>Actinobacillus</i>    | 15.156             | 0.021               | 11.2180    | 0.3861   |
|                |                      | <i>Haemophilus</i>       | 0.075 <sup>b</sup> | 31.587 <sup>a</sup> | 6.3867     | 0.0150   |

<sup>1</sup>Human milk = exclusively fed human milk, mixed = mixed human milk and formula fed.

## References

1. Apgar, V. A. Proposal for a new method of evaluation of the newborn infant. *Anesth. Analg.* **2015**, *120*, 1056–1059, doi:10.1213/ANE.0b013e31829bdc5c.
